# Supplementary material for: Flexible, self-healing and portable supramolecular visualization smart sensors for monitoring and quantifying structural damage
Source: Royal Society of Chemistry journal article supplement (doi:10.1039/d4mh01233j), 2024-10-11
Supplement: d4mh01233j1.pdf [file d4mh01233j1.pdf]

## Supplementary Materials

# Flexible, Self-healing and Portable Supramolecular Visualization Smart Sensors for Monitoring and Quantifying Structural Damage

*Dezhi Jiao<sup>a</sup>, Sihan Gu<sup>a</sup>, Li Cheng<sup>b</sup>, Shuoqi Li<sup>a</sup>, Chengbao Liu<sup>a\*</sup>*

*<sup>a</sup>College of Materials Science and Engineering, Shandong University of Science and  
Technology, Qingdao 266590, China*

*<sup>b</sup>Laboratory of Advanced Rubber Material, Ministry of Education (Type B), Qingdao  
University of Science and Technology, Qingdao 266042, China*

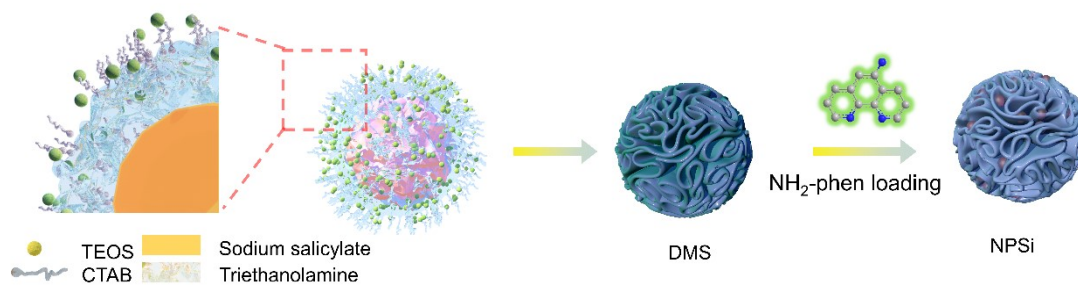

**Fig. S1.** The procedure schematic of preparation DMS and NPSi.

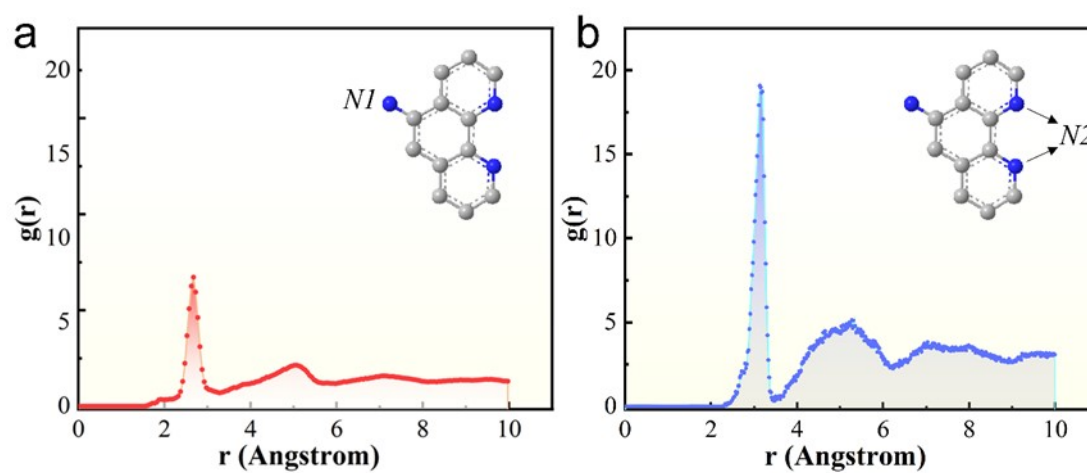

**Fig. S2.** The relevant RDF analysis of NH<sub>2</sub>-Phen molecule (a) NH<sub>2</sub>-Phen-N1 and (b) NH<sub>2</sub>-Phen-N2.

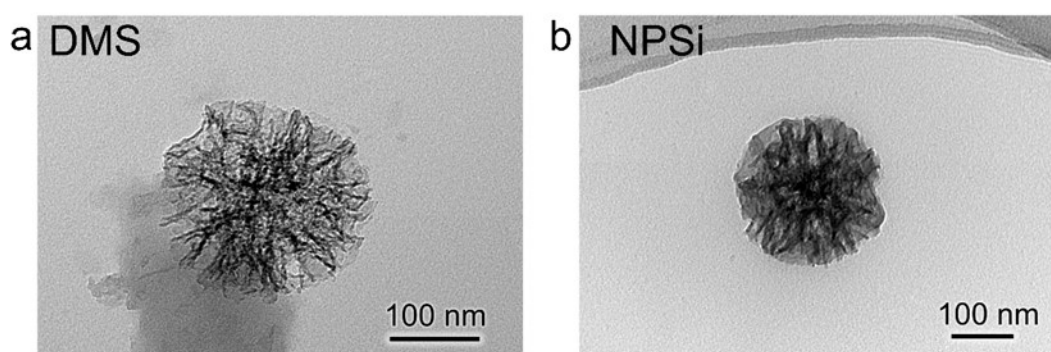

**Fig. S3.** TEM images of (a) DMS and (b) NPSi.

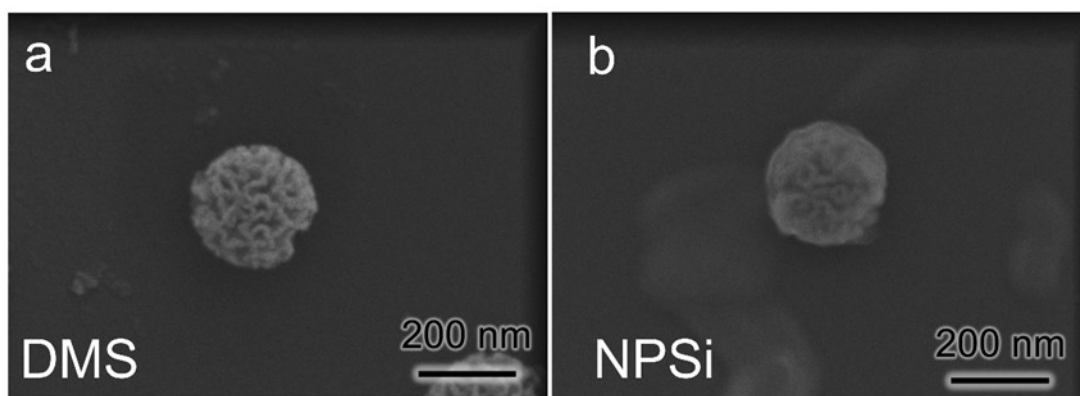

**Fig. S4.** SEM results of (a) DMS and (b) NPSi.

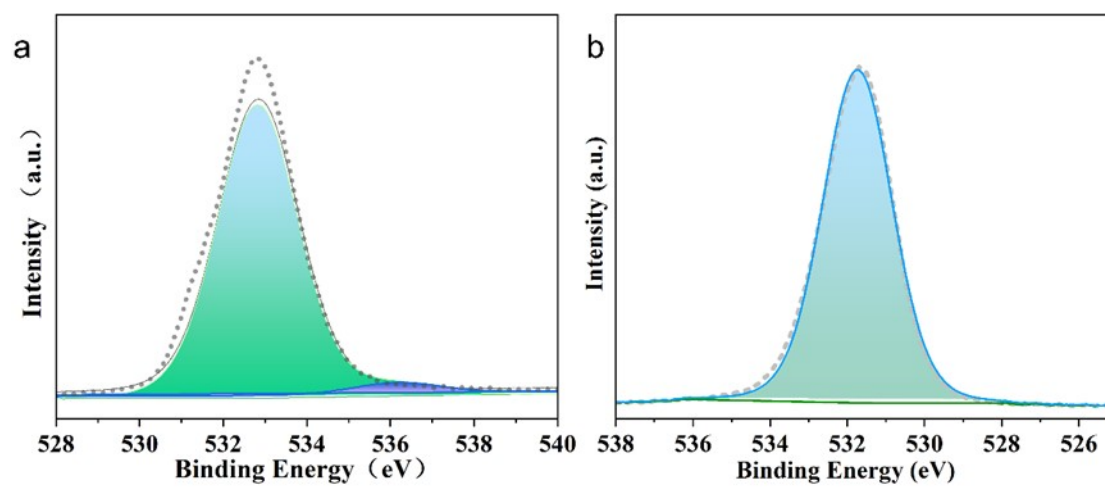

**Fig. S5.** XPS fine spectra (O 2p) of (a) NPSi and (b) DMS.

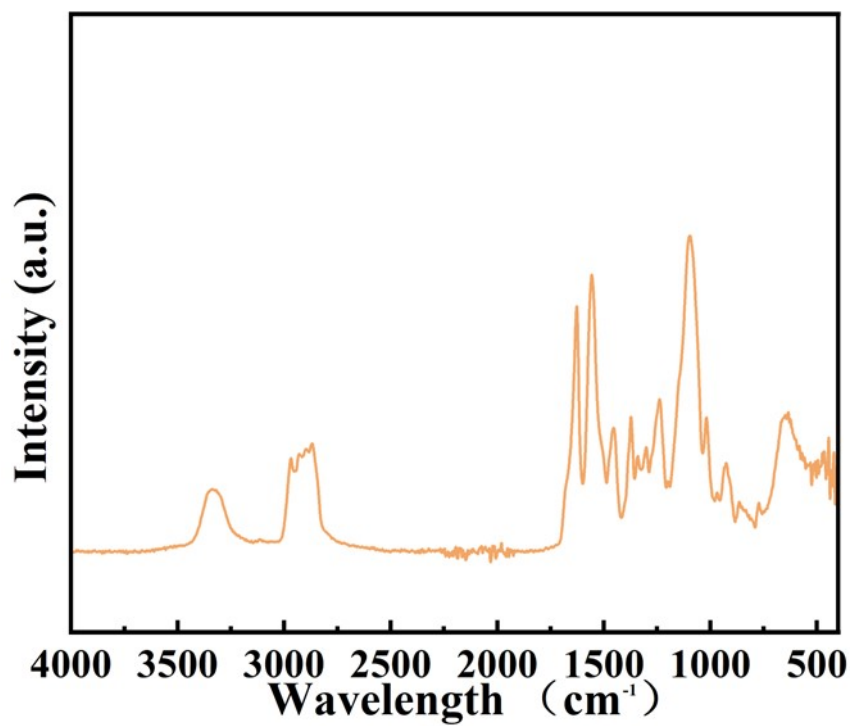

Fig. S6. Infrared spectra of the PU.

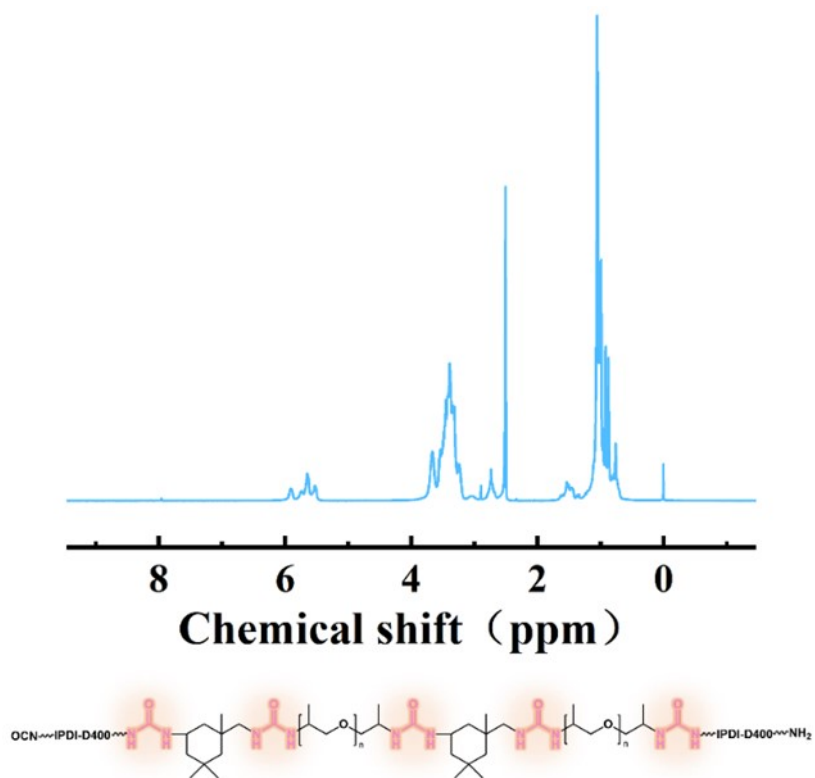

Fig. S7. <sup>1</sup>H NMR spectra of PU.

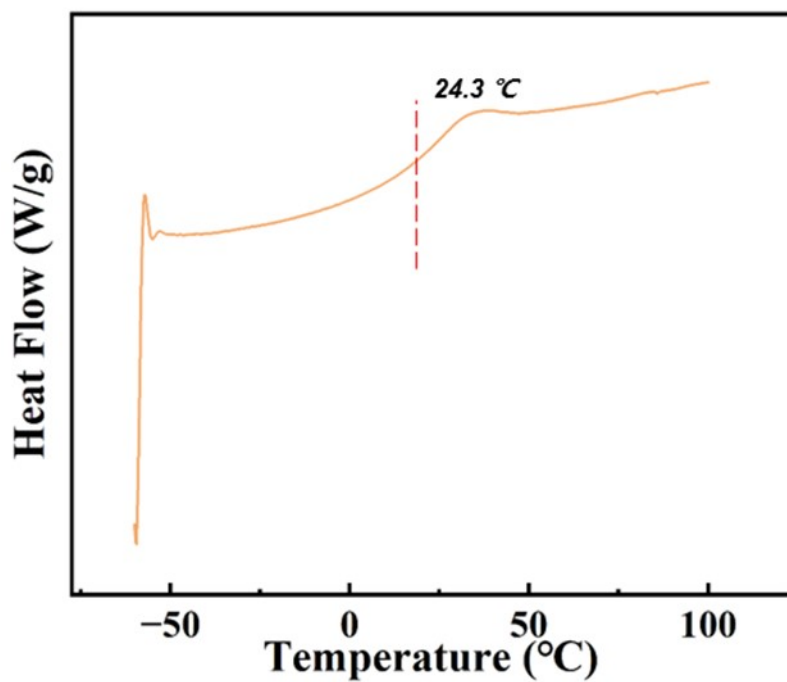

Fig. S8. DSC thermograms of PU.

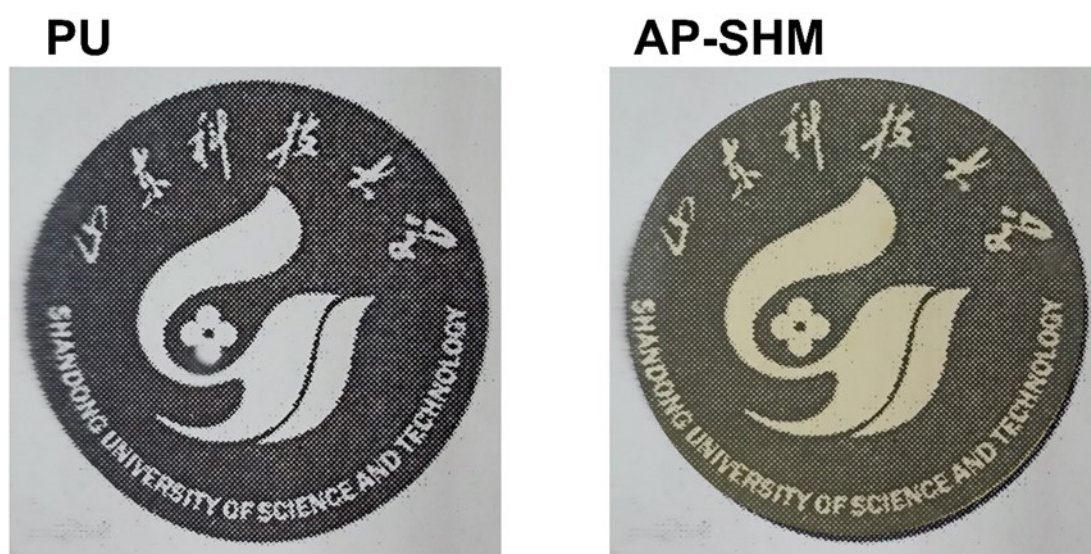

Fig. S9. Optical photograph of PU and AP-SHM.

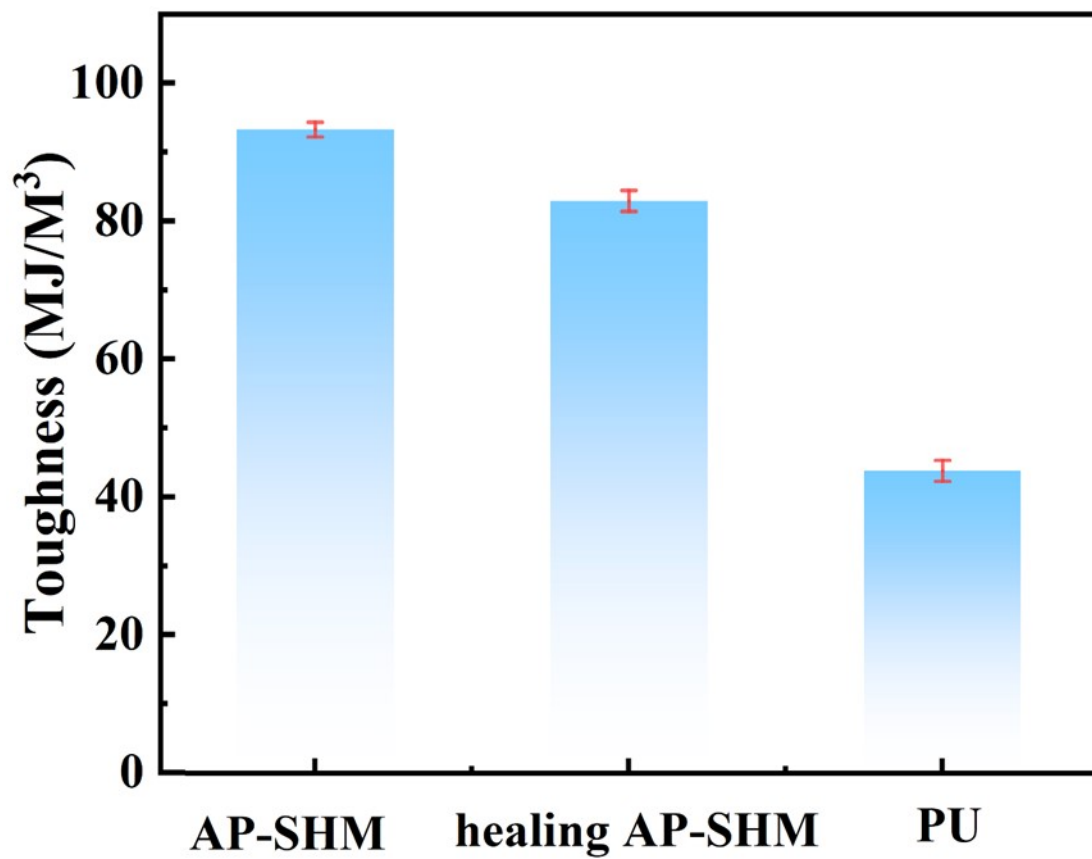

Fig. S10. The toughness of AP-SHM, healing AP-SHM, and PU.

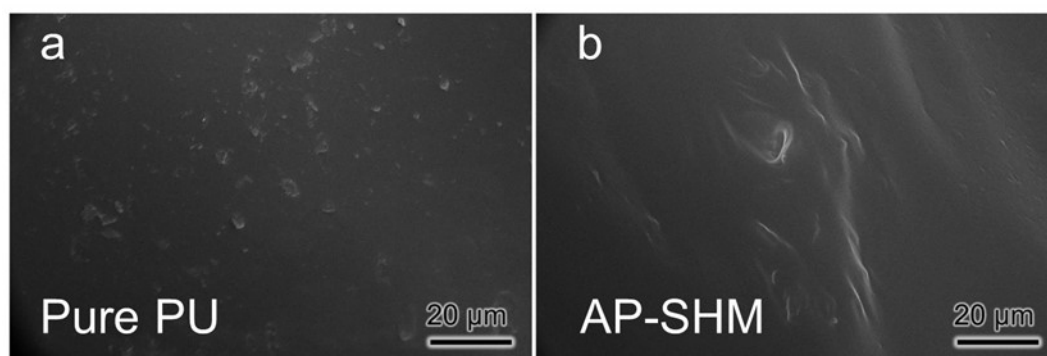

Fig. S11. SEM images of cross-section of (a) Pure PU and (b) AP-SHM.

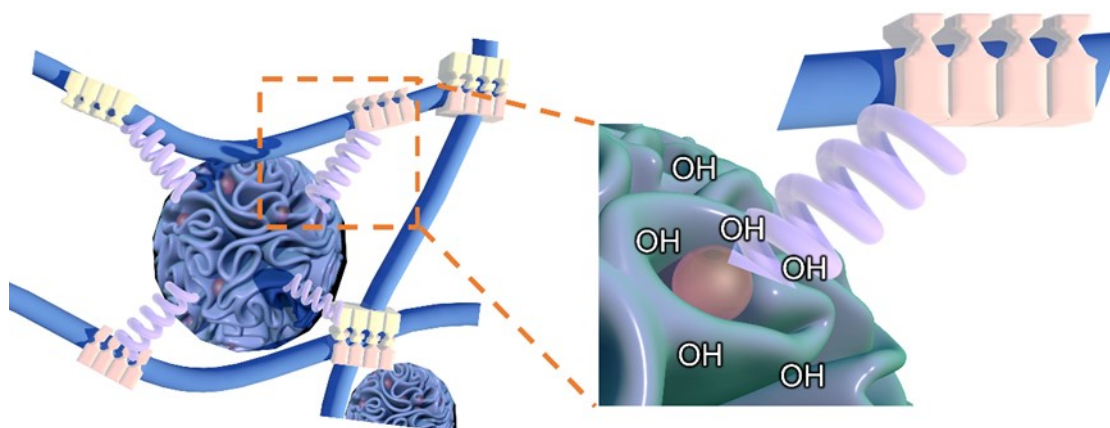

**Fig. S12.** The interaction mechanism between NPSi and PU molecule chain.

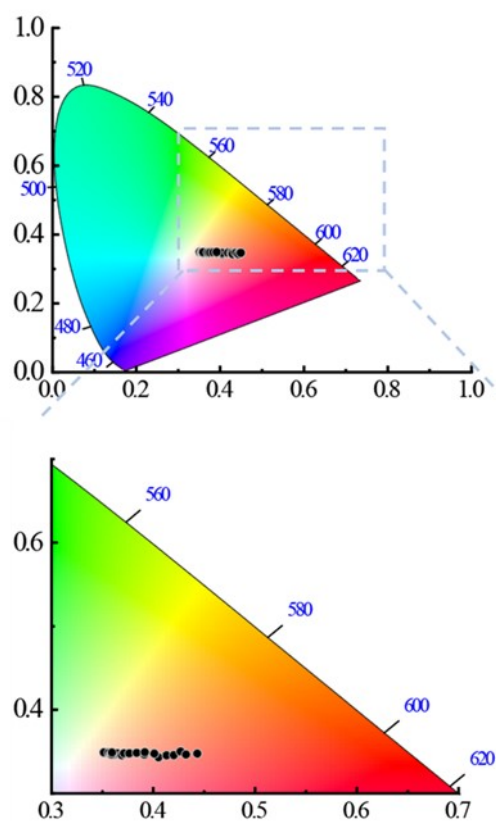

**Fig. S13.** chromaticity coordinate of FeTP with the addition of different concentrations of  $\text{Fe}^{2+}$ .

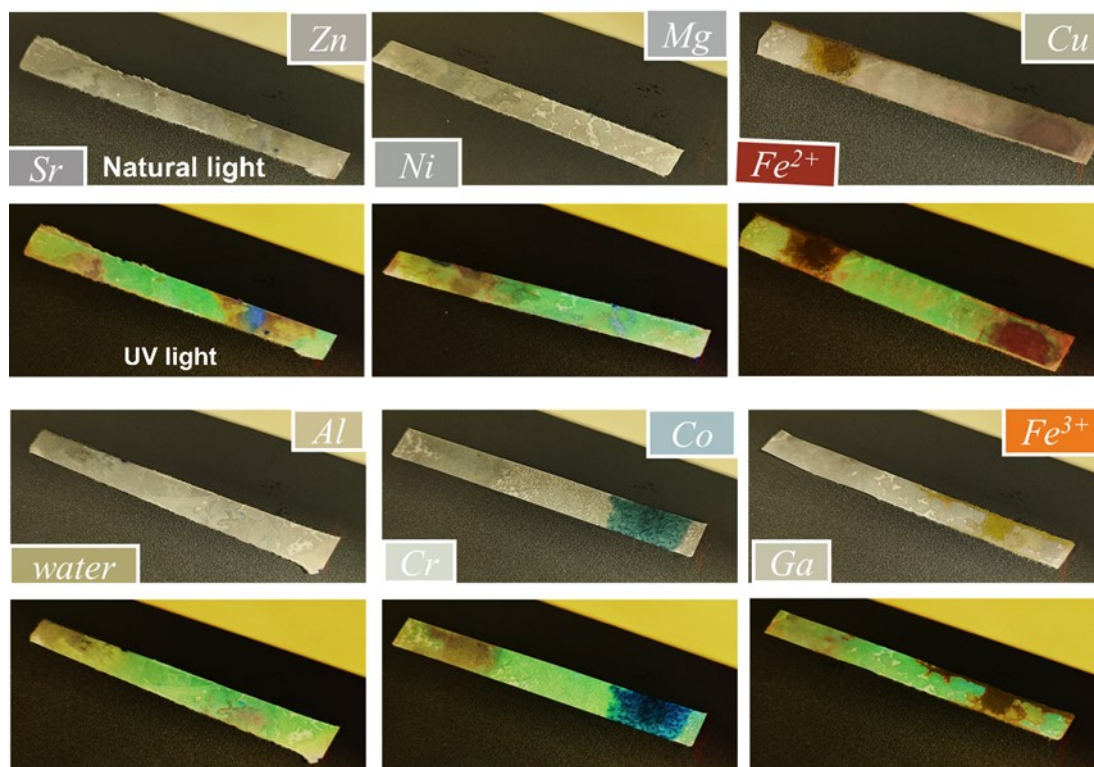

**Fig. S14.** Optical photograph of the FeTP addition with the equal concentration cation ( $\text{Al}^{3+}$ ,  $\text{Mg}^{2+}$ ,  $\text{Cu}^{2+}$ ,  $\text{Cr}^{3+}$ ,  $\text{Ni}^{2+}$ ,  $\text{Co}^{2+}$ ,  $\text{Fe}^{3+}$ ,  $\text{Fe}^{2+}$ ,  $\text{Sr}^{2+}$ ,  $\text{Zn}^{2+}$ ) in UV mode and vis mode.

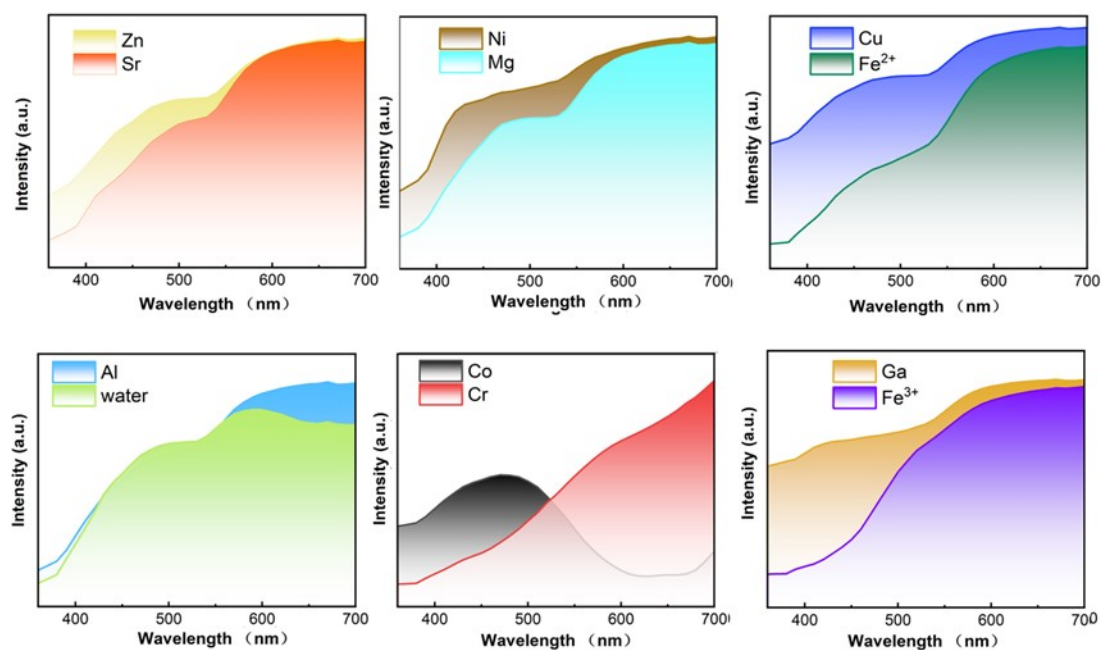

**Fig. S15.** UV-visible spectrum of the FeTP addition with the equal concentration cation ( $\text{Al}^{3+}$ ,  $\text{Mg}^{2+}$ ,  $\text{Cu}^{2+}$ ,  $\text{Cr}^{3+}$ ,  $\text{Ni}^{2+}$ ,  $\text{Co}^{2+}$ ,  $\text{Fe}^{3+}$ ,  $\text{Fe}^{2+}$ ,  $\text{Sr}^{2+}$ ,  $\text{Zn}^{2+}$ ).



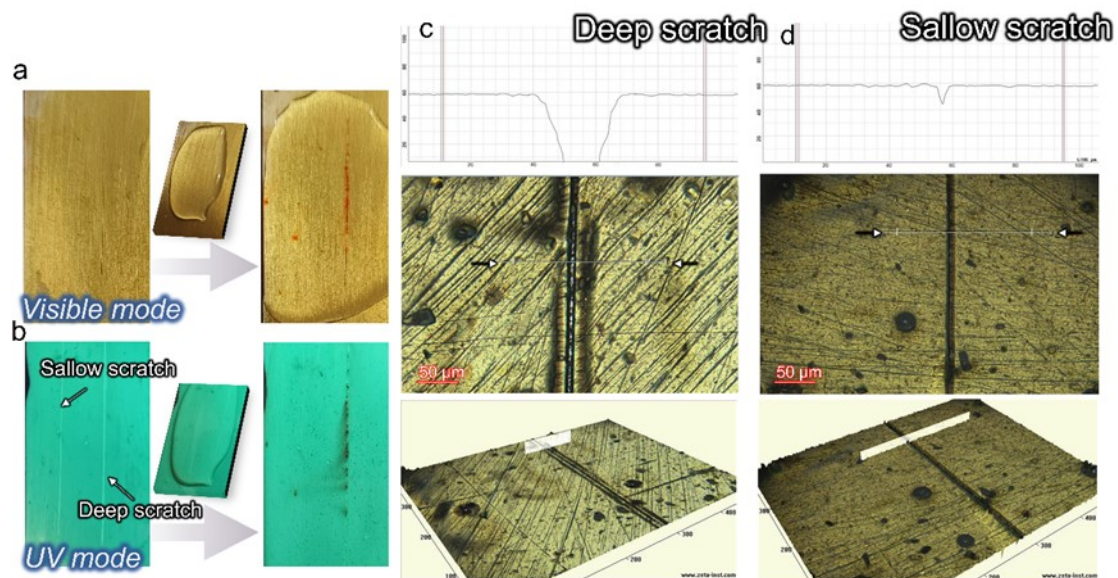

**Fig. S16.** Optical photographs of different types of scratches on AP-SHM in (a) visible mode and (b) UV mode; The 3D morphology results of scratches on AP-SHM: (c) deep scratch and (d) sallow scratch.

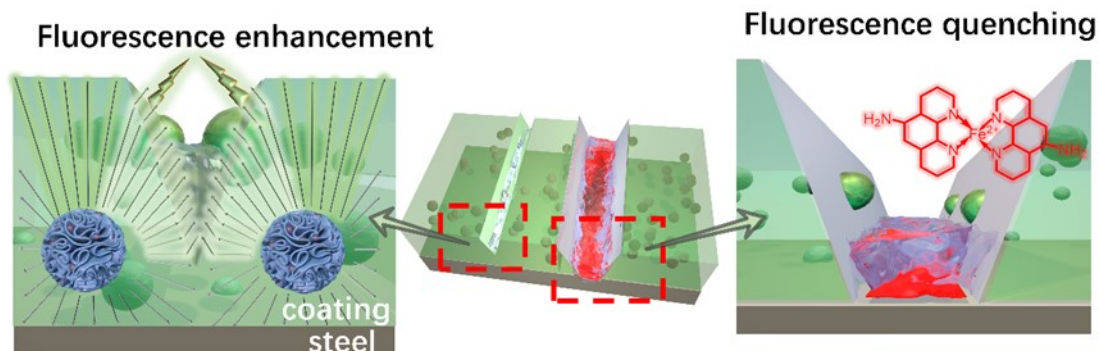

**Fig. S17.** Schematic diagram of damage-induced enhancement mechanism.

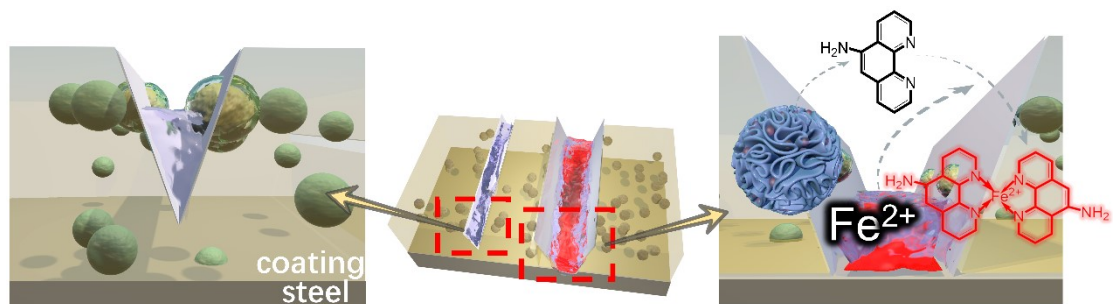

**Fig. S18.** Schematic diagram of ion recognition quenching mechanism.

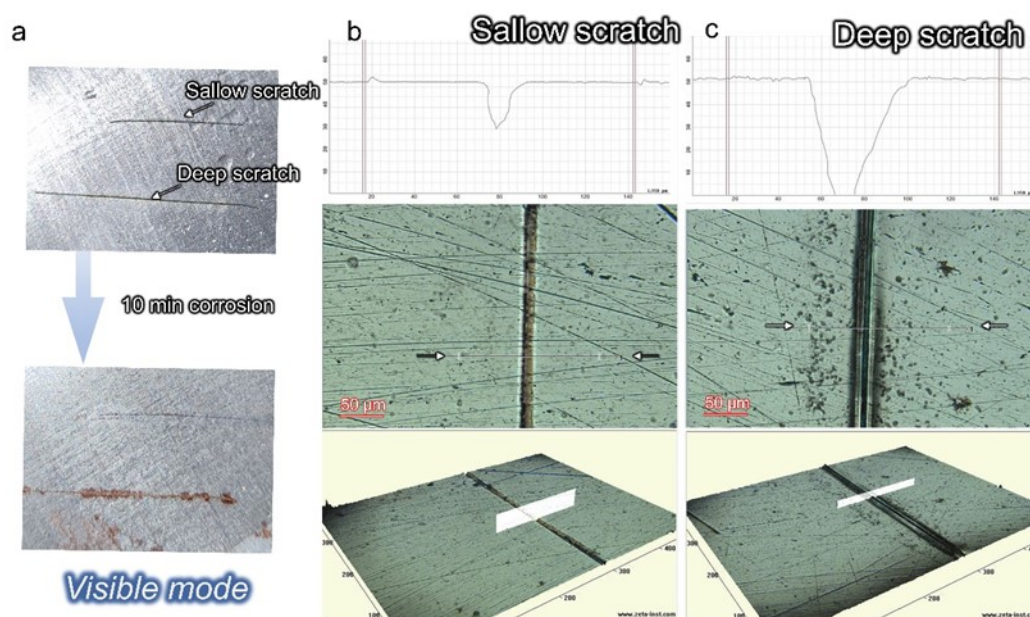

**Fig. S19.** Optical photographs of different types of scratches on PU; The 3D morphology results of different types of scratches on PU.

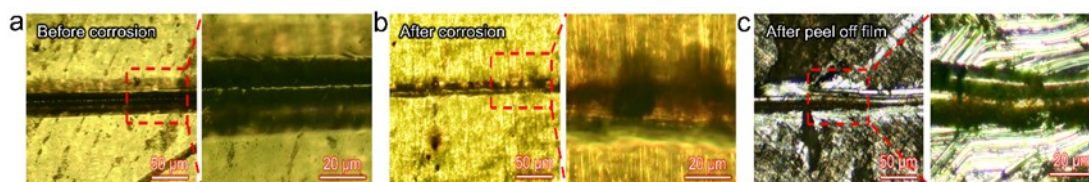

**Fig. S20.** Optical microscope photographs of (a) before corrosion, (b) after corrosion, and c) after peel off film for deep scratch.

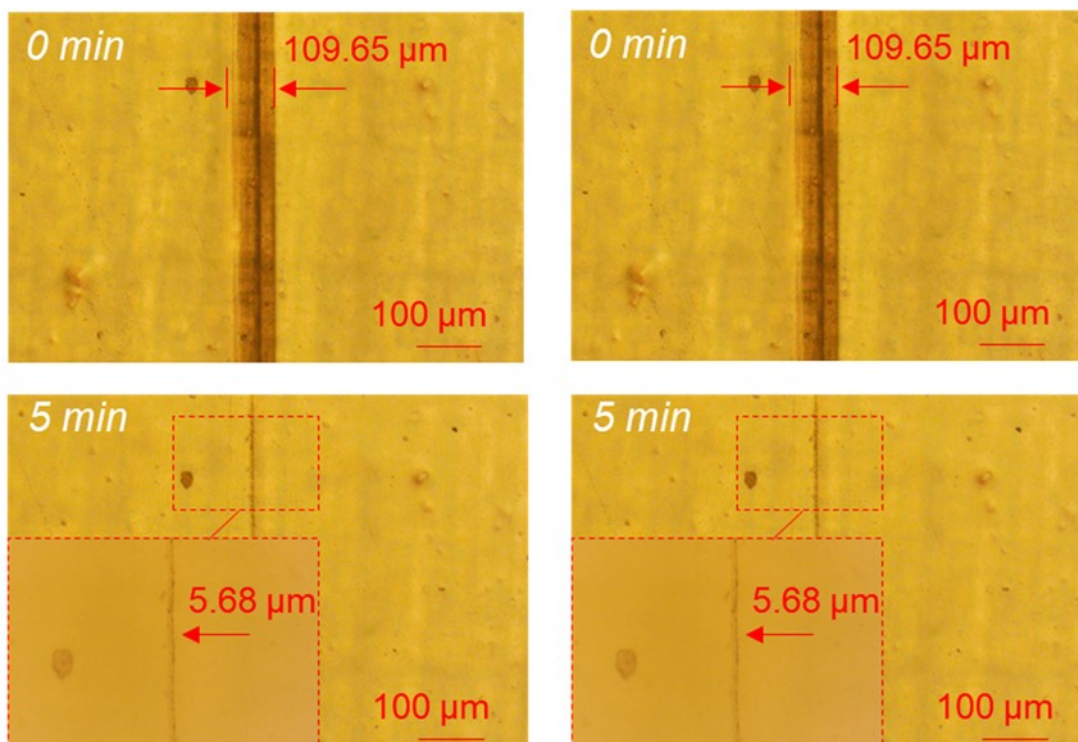

Fig. S21. The self-healing process of coated AP-SHM sample.

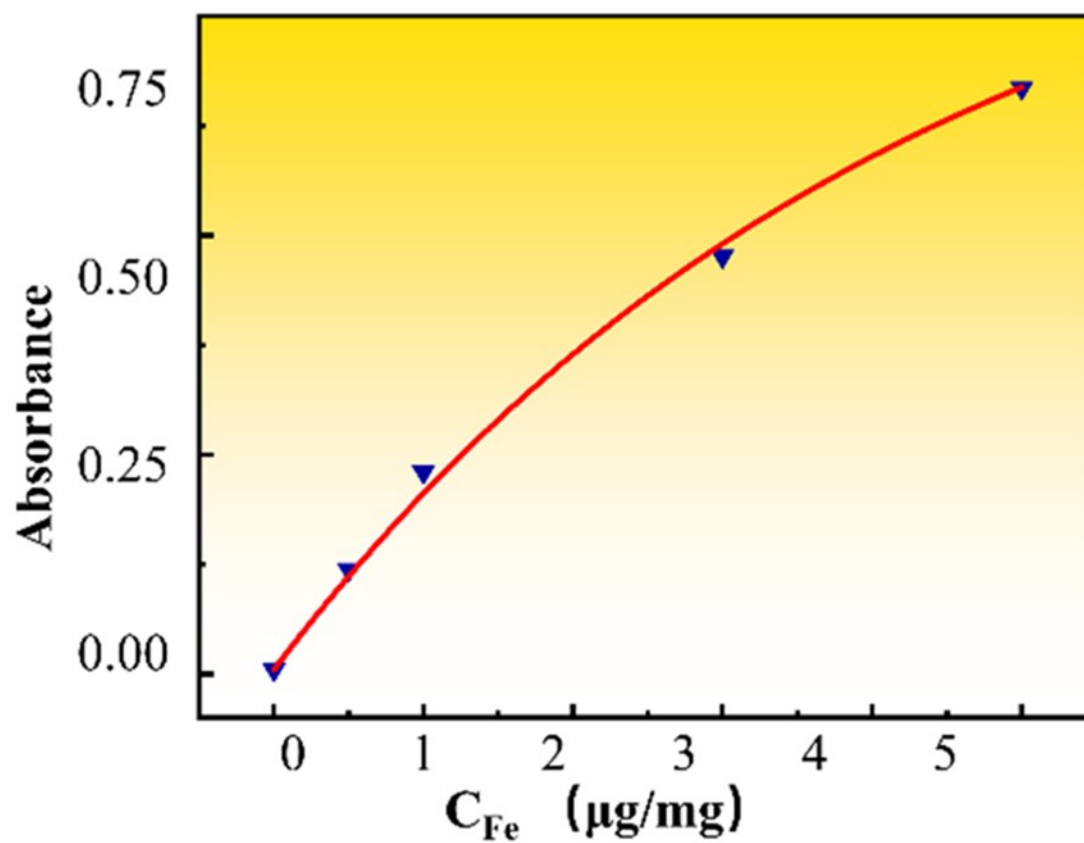

Fig. S22. Concentration-absorbance curve of elemental iron standard solution.

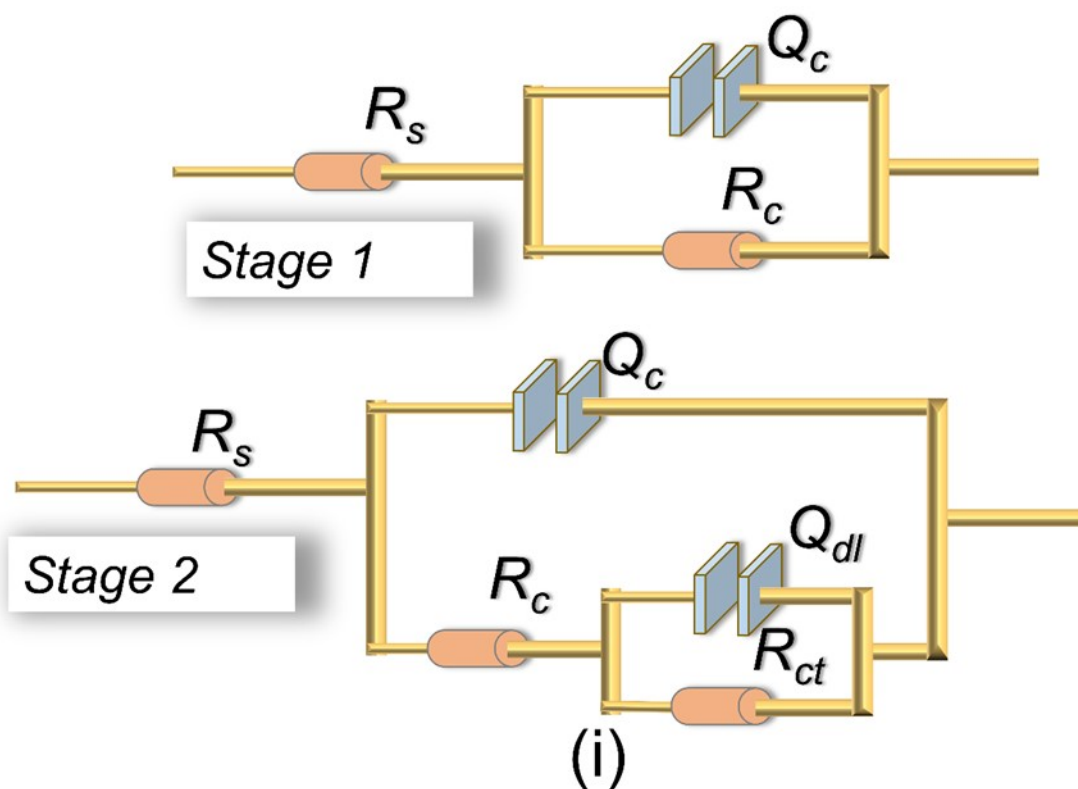

**Fig. S23.** Electrical equivalent circuit models.

**Table S1** EIS fitting parameters for stage 1.

| Time (d)                                                  | 0.04 | 0.1   | 0.2  | 0.3  | 0.4  |
|-----------------------------------------------------------|------|-------|------|------|------|
| $R_s(\Omega \cdot \text{cm}^2)$                           | 5.67 | 6.41  | 6.33 | 5.91 | 6.35 |
| $CPE (\mu\Omega^{-1} \cdot \text{cm}^2 \cdot \text{S}^n)$ | 1.73 | 2.175 | 2.2  | 2.61 | 2.81 |
| $n$                                                       | 0.82 | 0.78  | 0.79 | 0.77 | 0.75 |
| $R_t(\Omega \cdot \text{cm}^2)$                           | 1126 | 1362  | 2452 | 1201 | 1979 |
| $\chi^2 (10^{-3})$                                        | 2.51 | 1.93  | 1.56 | 2.26 | 3.95 |

**Table S2** EIS fitting parameters for stage 2 and 3.

| Equation                                                    | $Y_{\text{FAAS}} = A_1 e^{-\frac{x}{t_1}} + A_2 e^{-\frac{x}{t_2}} + Y_0$ |       |                |      | $Y_{\text{c-G}} = A_1 e^{-\frac{x}{t_1}} + A_2 e^{-\frac{x}{t_2}} + Y_0$ |                                 |       |       | $Y_{\text{Z-c}} = A_1 e^{-\frac{x}{t_1}} + Y_0$ |       |
|-------------------------------------------------------------|---------------------------------------------------------------------------|-------|----------------|------|--------------------------------------------------------------------------|---------------------------------|-------|-------|-------------------------------------------------|-------|
|                                                             | 0.5                                                                       | 1     | 1.5            | 2    | 3                                                                        | 4                               | 5     | 6     | 7                                               |       |
| Time (d)                                                    | $Y_0$                                                                     | 0.5   | 1              | 1.5  | 2                                                                        | 3                               | 4     | 5     | 6                                               | 7     |
|                                                             |                                                                           |       | 0.973          |      |                                                                          | $4.427 \times 10^6$             |       |       | 3.072                                           |       |
| $R_s (\Omega \cdot \text{cm}^2)$                            | $A_1$                                                                     | 6.1   | 6.57<br>-0.484 | 5.96 | 6.47                                                                     | 6.61<br>$-9.396 \times 10^{-4}$ | 6.01  | 5.43  | 5.59<br>$3.252 \times 10^{30}$                  | 5.58  |
| $CPE_1 (\mu\Omega^{-1} \cdot \text{cm}^2 \cdot \text{S}^n)$ | $t_1$                                                                     | 2.09  | 2.47<br>3.901  | 2.33 | 1.70                                                                     | 1.53<br>-0.487                  | 1.95  | 1.83  | 1.78<br>3.006                                   | 2.04  |
| $n_1$                                                       | $A_2$                                                                     | 0.74  | 0.74<br>-0.484 | 0.74 | 0.76                                                                     | 0.74<br>$-4.426 \times 10^6$    | 0.71  | 0.71  | 0.72<br>-                                       | 0.71  |
| $R_c (\Omega \cdot \text{cm}^2)$                            | $t_2$                                                                     | 11.42 | 13.42<br>4.769 | 8.68 | 6.26                                                                     | 8.63<br>$-3.411 \times 10^5$    | 10.17 | 6.48  | 10.91<br>-                                      | 10.91 |
| $CPE_2 (\mu\Omega^{-1} \text{cm}^2 \text{S}^n)$             | $R^2$                                                                     | 0.75  | 0.75<br>0.998  | 0.89 | 1.28                                                                     | 0.72<br>0.987                   | 0.56  | 1.18  | 0.48<br>0.974                                   | 0.56  |
| $n_2$                                                       |                                                                           | 0.86  | 0.88           | 0.88 | 0.83                                                                     | 0.89                            | 0.94  | 0.84  | 0.97                                            | 0.92  |
| $R_{\text{ct}} (\Omega \cdot \text{cm}^2)$                  |                                                                           | 1639  | 1611           | 1465 | 2348                                                                     | 2680                            | 3018  | 3754  | 2271                                            | 2107  |
| $\chi^2 (10^{-4})$                                          |                                                                           | 4.37  | 6.13           | 7.87 | 6.28                                                                     | 6.09                            | 6.44  | 6.217 | 9.11                                            | 5.22  |

**Table S3** Algorithmic fitting equations and parameters.

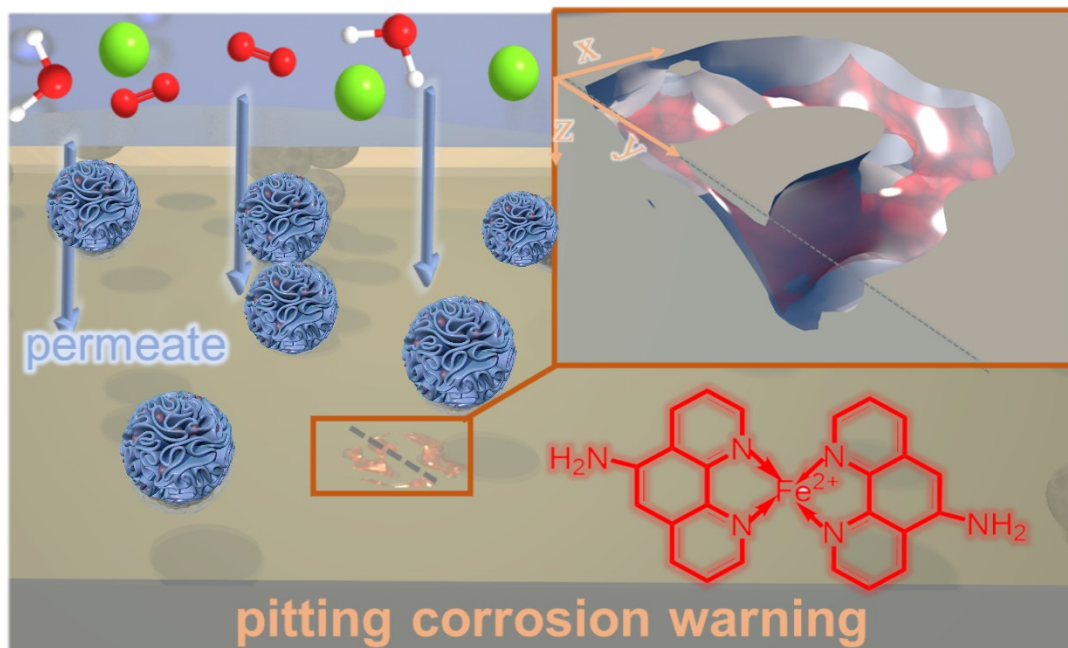

**Fig. S24.** Schematic diagram of AP-SHM pitting corrosion warning.

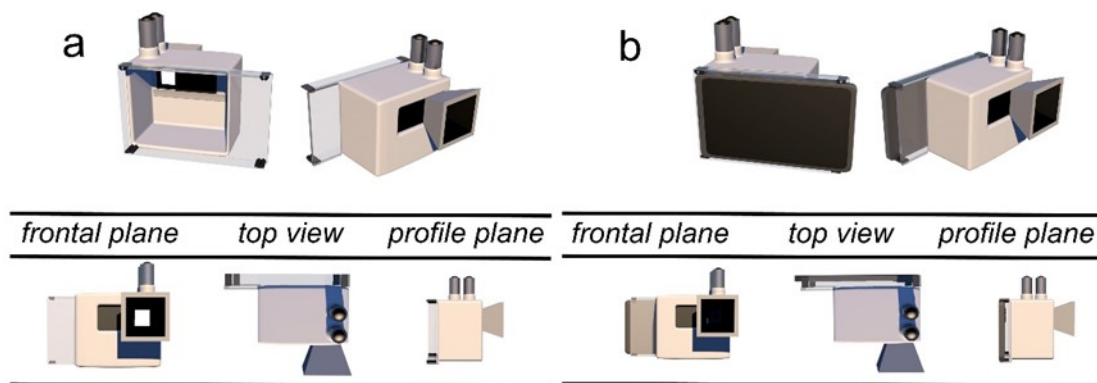

**Fig. S25.** (a) The portable detachable device that assist with image acquisition; (b) the integrated portable device with image capture platform.

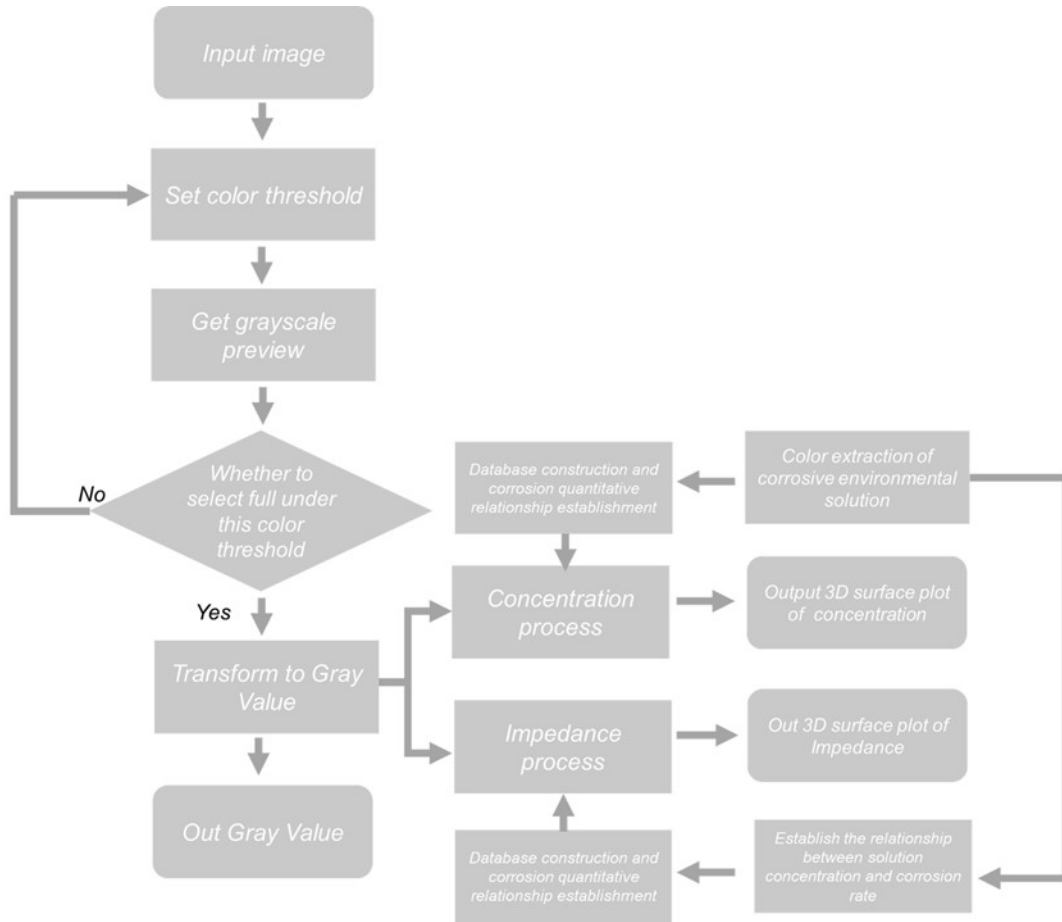

**Fig. S26.** Diagram of software AI algorithm.

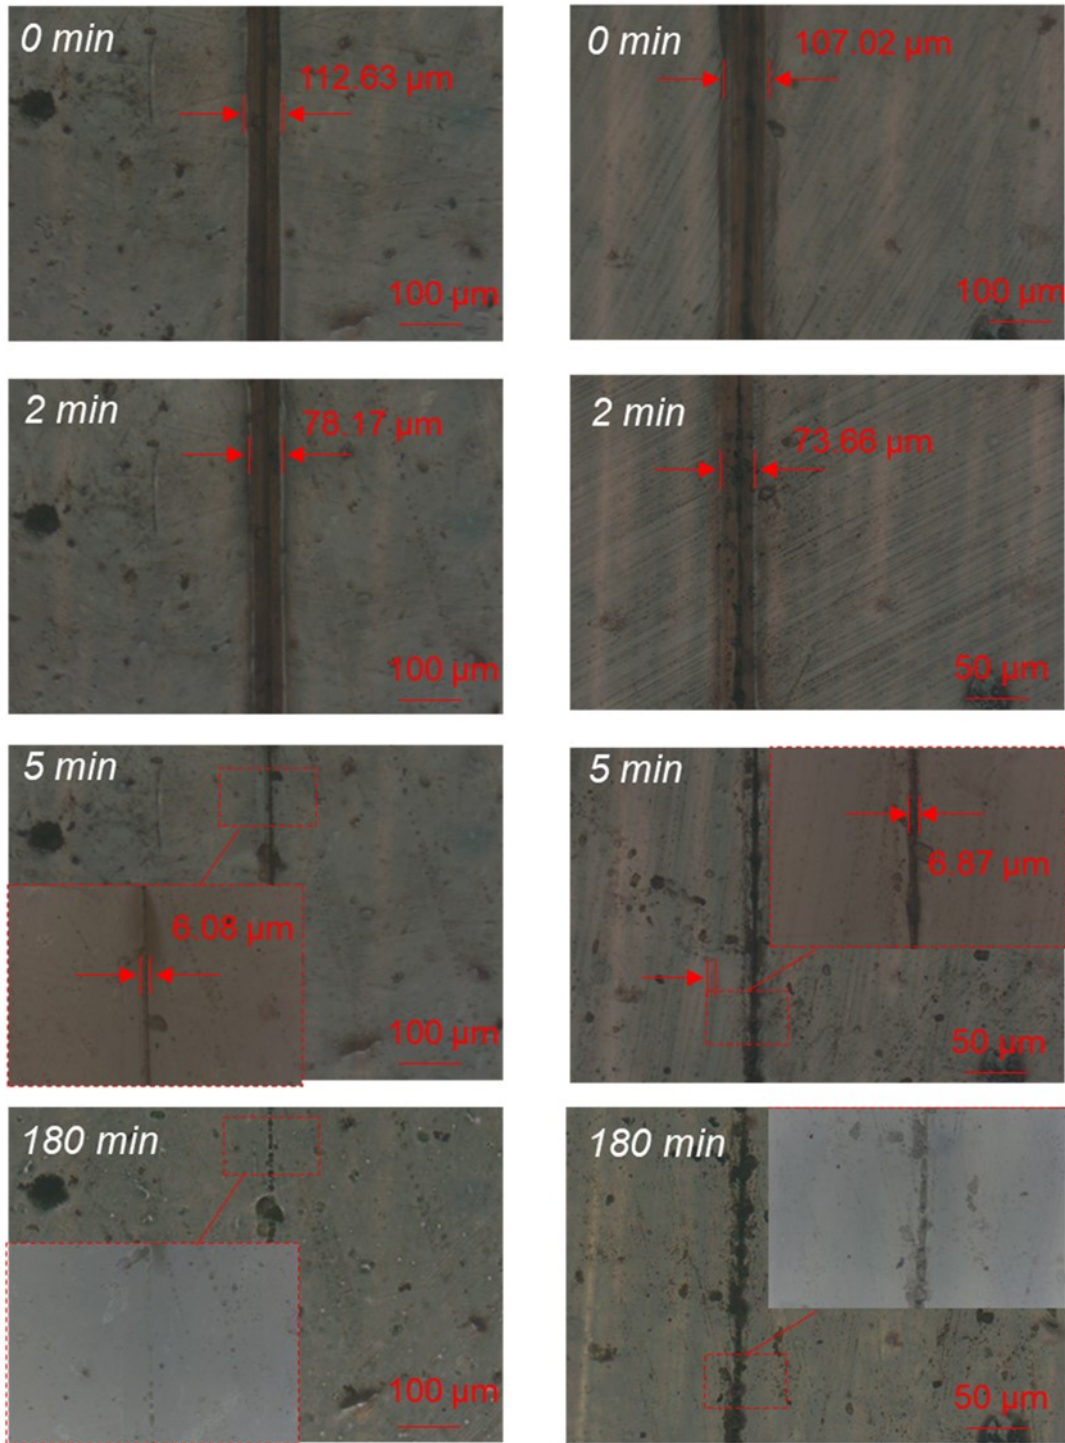

**Fig. S27.** The specific healing process of AP-SHM that exposed in a) spray test and b)

-10 °C



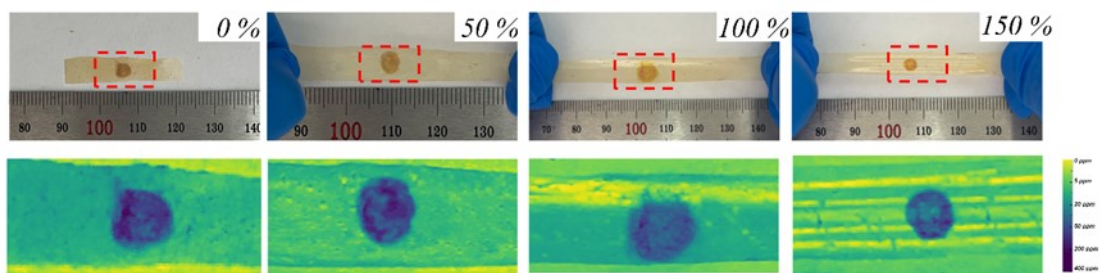

**Fig. S28.** Responsiveness of AP-SHM under stretchable strain.

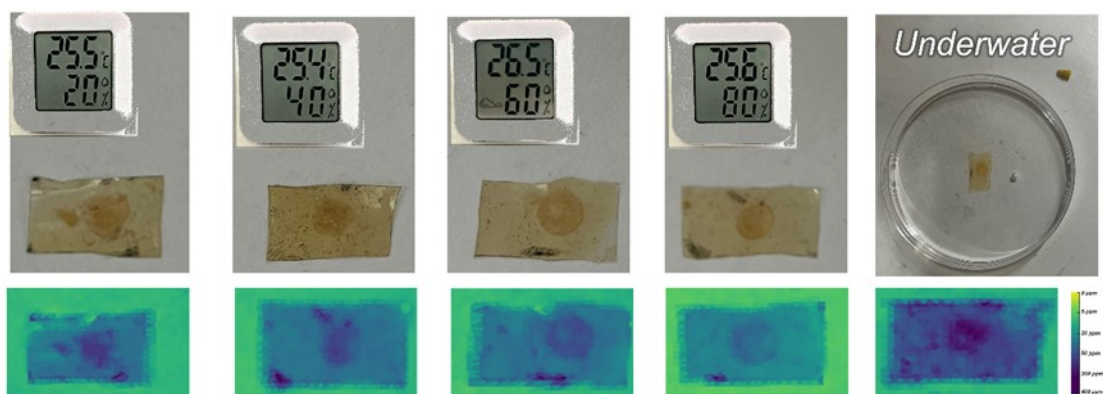

**Fig. S29.** Responsiveness of AP-SHM under different humidity.

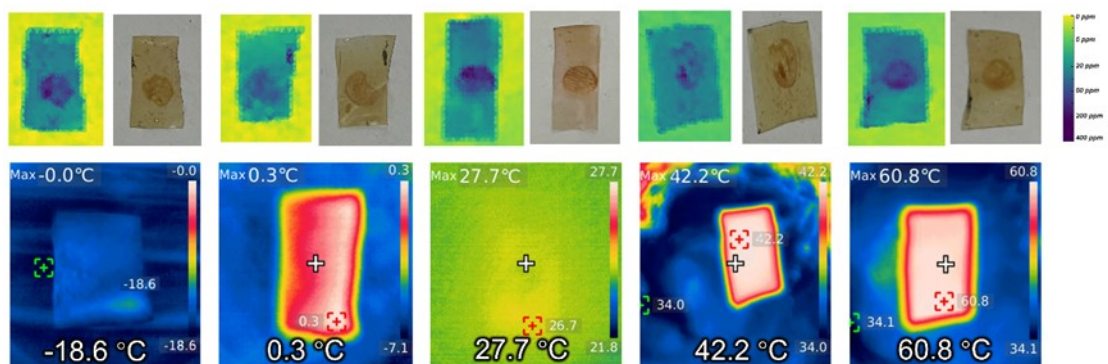

**Fig. S30.** Responsiveness of AP-SHM under different temperature.

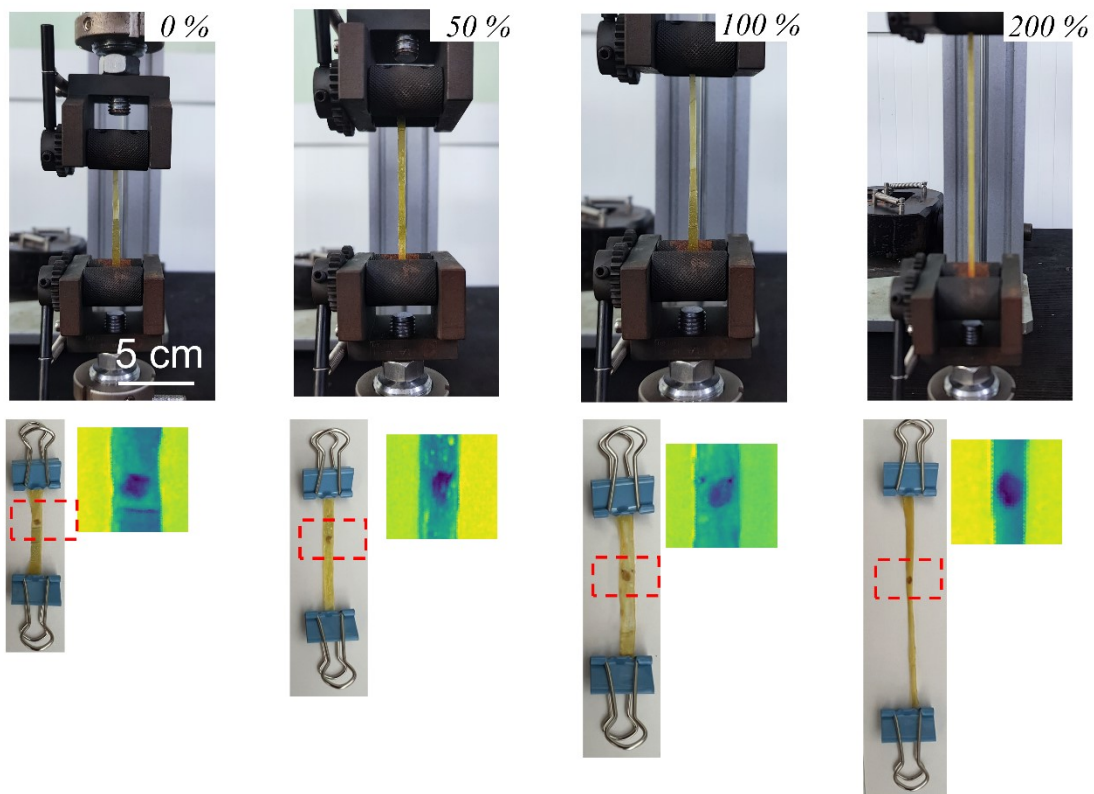

**Fig. S31.** Continuous stretching with different degrees of deformation for one week.
